# Supplementary material for: Patient-Driven Discovery, Therapeutic Targeting, and Post-Clinical Validation of a Novel AKT1 Fusion–Driven Cancer
Source: Oxford University Press journal article supplement (doi:10.1158/2159-8290.cd-18-0953), 2019-03-15
Supplement: 21598290cd180953-sup-207185_2_supp_5379346_pnfwr8.xlsx [file 21598290cd180953-sup-207185_2_supp_5379346_pnfwr8.xlsx]

## Sheet: Legend
Dataset D: comparison of Temsirolimus treated animals at 3 and 40 days of treatment
Sample	treatment	duration	Animal number
V3	vehicle	3 days	1, 2, 3 = animal number
I3	Ipatasertib	3 days	1, 2, 3 = animal number
T3	Temsirolimus	3 days	1, 2, 3 = animal number
M3	MK2206	3 days	1, 2, 3 = animal number
V40	vehicle	40 days	1, 2, 3 = animal number
I40	Ipatasertib	40 days	1, 2, 3 = animal number
T40	Temsirolimus	40 days	1, 2, 3 = animal number
M40	MK2206	40 days	1, 2, 3 = animal number

## Sheet: RawLog2
		Antibody Name	14-3-3-beta	14-3-3-zeta	4E-BP1	4E-BP1_pS65	53BP1	A-Raf	ACC1	ACC_pS79	Akt	Akt_pS473	Akt_pT308	AMPK-a2_pS345	AMPKa	AMPKa_pT172	AR	ARID1A	Atg3	Atg7	ATM	ATM_pS1981	ATR_pS428	Aurora-B	Axl	b-Actin	b-Catenin	b-Catenin_pT41_S45	B-Raf	B-Raf_pS445	B7-H4	Bad_pS112	Bak	Bax	Bcl-xL	Beclin	Bid	Bim	BRD4	c-Abl	c-IAP2	c-Jun_pS73	c-Kit	c-Myc	C-Raf	C-Raf_pS338	Caspase-3	Caspase-7-cleaved	Caveolin-1
		Antibody Origin	R	R	R	R	R	R	R	R	R	R	R	R	R	R	R	R	R	R	R	R	R	R	R	R	R	R	R	R	R	R	R	R	R	G	R	R	R	R	R	R	R	R	R	R	R	R	R
		Gene Name	YWHAB	YWHAZ	EIF4EBP1	EIF4EBP1	TP53BP1	ARAF	ACACA	ACACA	AKT1	AKT1	AKT1	PRKAA2	PRKAA1	PRKAA1	AR	ARID1A	ATG3	ATG7	ATM	ATM	ATR	AIM1	AXL	ACTB	CTNNB1	CTNNB1	BRAF	BRAF	VTCN1	BAD	BAK1	BAX	BCL2L1	BECN1	BID	BCL2L11	BRD4	ABL1	BIRC3	JUN	KIT	MYC	RAF1	RAF1	CASP3	CASP7	CAV1
		Validation Status	V	V	V	V	V	V	C	V	V	V	V	V	C	C	V	C	V	V	V	V	C	V	V	C	V	V	C	V	C	V	C	V	V	C	C	V	V	V	C	V	V	C	C	V	C	C	V
		Slide Id	GBL1105912	GBL1105913	GBL1105659	GBL1105660	GBL1105771	GBL1105824	GBL1105662	GBL1105661	GBL1105792	GBL1105705	GBL1105811	GBL1105844	GBL1105663	GBL1105664	GBL1105752	GBL1105857	GBL1105864	GBL1105865	GBL1105846	GBL1105847	GBL1105888	GBL1105854	GBL1105836	GBL1106096	GBL1105668	GBL1105818	GBL1105901	GBL1105672	GBL1105883	GBL1105665	GBL1105666	GBL1105667	GBL1105669	GBL1106080	GBL1105670	GBL1105671	GBL1105860	GBL1105859	GBL1105866	GBL1105678	GBL1105679	GBL1105915	GBL1105822	GBL1105700	GBL1105673	GBL1105674	GBL1105675
		Antibody Name in Heatmap	14-3-3-beta-R-V	14-3-3-zeta-R-V	4E-BP1-R-V	4E-BP1_pS65-R-V	53BP1-R-V	A-Raf-R-V	ACC1-R-C	ACC_pS79-R-V	Akt-R-V	Akt_pS473-R-V	Akt_pT308-R-V	AMPK-a2_pS345-R-V	AMPKa-R-C	AMPKa_pT172-R-C	AR-R-V	ARID1A-R-C	Atg3-R-V	Atg7-R-V	ATM-R-V	ATM_pS1981-R-V	ATR_pS428-R-C	Aurora-B-R-V	Axl-R-V	b-Actin-R-C	b-Catenin-R-V	b-Catenin_pT41_S45-R-V	B-Raf-R-C	B-Raf_pS445-R-V	B7-H4-R-C	Bad_pS112-R-V	Bak-R-C	Bax-R-V	Bcl-xL-R-V	Beclin-G-C	Bid-R-C	Bim-R-V	BRD4-R-V	c-Abl-R-V	c-IAP2-R-C	c-Jun_pS73-R-V	c-Kit-R-V	c-Myc-R-C	C-Raf-R-C	C-Raf_pS338-R-V	Caspase-3-R-C	Caspase-7-cleaved-R-C	Caveolin-1-R-V
		Probabilities (QC Score)	0.964705	0.936076	0.966809	0.971632	0.976831	0.971028	0.957822	0.961832	0.966332	0.955601	0.964728	0.93228	0.951468	0.963269	0.95913	0.962868	0.936483	0.945226	0.9625	0.891331	0.96244	0.947626	0.975537	0.915854	0.96602	0.963589	0.929994	0.97395	0.911204	0.95666	0.953484	0.950694	0.968278	0.949376	0.965694	0.953509	0.972548	0.952763	0.948834	0.959912	0.948749	0.96168	0.959615	0.970371	0.966016	0.95859	0.951676
		Slide no.	1	2	3	4	5	6	7	8	9	10	11	12	13	14	15	16	17	18	19	20	21	22	23	24	25	26	27	28	29	30	31	32	33	34	35	36	37	38	39	40	41	42	43	44	45	46	47
Order	Sample description	Sample Type	14-3-3-beta-R-V	14-3-3-zeta-R-V	4E-BP1-R-V	4E-BP1_pS65-R-V	53BP1-R-V	A-Raf-R-V	ACC1-R-C	ACC_pS79-R-V	Akt-R-V	Akt_pS473-R-V	Akt_pT308-R-V	AMPK-a2_pS345-R-V	AMPKa-R-C	AMPKa_pT172-R-C	AR-R-V	ARID1A-R-C	Atg3-R-V	Atg7-R-V	ATM-R-V	ATM_pS1981-R-V	ATR_pS428-R-C	Aurora-B-R-V	Axl-R-V	b-Actin-R-C	b-Catenin-R-V	b-Catenin_pT41_S45-R-V	B-Raf-R-C	B-Raf_pS445-R-V	B7-H4-R-C	Bad_pS112-R-V	Bak-R-C	Bax-R-V	Bcl-xL-R-V	Beclin-G-C	Bid-R-C	Bim-R-V	BRD4-R-V	c-Abl-R-V	c-IAP2-R-C	c-Jun_pS73-R-V	c-Kit-R-V	c-Myc-R-C	C-Raf-R-C	C-Raf_pS338-R-V	Caspase-3-R-C	Caspase-7-cleaved-R-C	Caveolin-1-R-V
			RawLog2	RawLog2	RawLog2	RawLog2	RawLog2	RawLog2	RawLog2	RawLog2	RawLog2	RawLog2	RawLog2	RawLog2	RawLog2	RawLog2	RawLog2	RawLog2	RawLog2	RawLog2	RawLog2	RawLog2	RawLog2	RawLog2	RawLog2	RawLog2	RawLog2	RawLog2	RawLog2	RawLog2	RawLog2	RawLog2	RawLog2	RawLog2	RawLog2	RawLog2	RawLog2	RawLog2	RawLog2	RawLog2	RawLog2	RawLog2	RawLog2	RawLog2	RawLog2	RawLog2	RawLog2	RawLog2	RawLog2
960	T3.1	Xenograft	0.771601	1.015	0.0125541	0.677392	1.62142	1.11584	2.19064	0.892044	3.58321	3.19155	1.77625	-0.355913	1.3535	3.08511	1.17508	2.68813	-0.429836	0.571064	1.29462	-1.67383	-0.479539	-1.2064	0.259253	1.20949	1.92742	0.094752	1.9007	1.36166	-1.71344	0.446784	0.412336	0.247618	0.72002	0.0460355	-0.602255	0.0599143	2.74493	-0.413415	-0.0316871	-0.503789	0.675869	-0.151727	1.15209	0.273717	0.0196213	0.214657	0.410558
981	T3.2	Xenograft	0.636498	0.873269	-0.22888	0.644902	2.05601	1.0796	1.98953	0.627857	3.53659	3.04967	2.89786	-0.415549	1.31421	2.61518	1.21177	2.70749	-0.56221	0.343811	1.5144	-1.91726	-0.461092	-1.29952	-0.124453	0.57623	2.19976	-0.0345877	1.72828	1.50654	-1.92014	0.258985	0.232045	0.0329857	0.684261	-0.249611	-0.802323	0.0689932	2.8647	-0.39216	-0.459883	-0.729442	0.458521	-0.0844044	1.17148	0.0956167	-0.15364	-0.274134	1.56431
982	T3.3	Xenograft	0.701428	1.04515	-0.248834	0.636348	1.86905	1.10474	2.16431	0.592098	3.39679	2.93435	2.46036	-0.769304	1.23887	2.35968	1.28252	2.8999	-0.389453	0.114518	1.52894	-1.85254	-0.581981	-1.23731	1.01103	0.33712	2.16998	-0.0174503	1.49166	1.3866	-1.89189	0.300202	0.256712	0.00906359	0.624697	-0.0687235	-0.867543	0.170471	3.036	-0.330121	-0.753275	-0.898735	0.179542	-0.103287	1.18882	0.0461942	-0.404616	-0.442235	1.59232
1007	T40.1	Xenograft	0.545739	0.927956	-0.488506	0.46659	1.40902	0.735049	2.09962	0.648542	3.05626	2.64849	1.86889	-0.677494	0.991911	2.08242	1.13915	2.18689	-0.485158	0.0689389	1.06686	-1.93457	-0.775635	-1.49177	-0.524905	1.22002	1.81838	-0.121219	1.59265	1.22279	-2.05706	0.0634703	0.189754	-0.260008	0.464142	-0.219889	-1.10897	-0.218228	2.36053	-0.710321	-0.773516	-1.08018	0.362879	-0.406829	0.902885	-0.00351835	-0.235528	-0.206567	0.299306
1008	T40.2	Xenograft	0.54619	0.740403	-0.610117	0.419289	1.65817	0.85085	1.54589	0.472855	3.40631	3.24719	2.80518	-0.553028	1.15311	2.43684	1.32033	2.53433	-0.828452	0.251258	1.23394	-2.0747	-0.783677	-1.55512	0.42816	0.391239	2.10101	-0.110141	1.59319	1.19973	-2.10697	0.20612	0.0444868	-0.262125	0.420237	-0.21271	-1.05699	-0.130872	2.76982	-0.555099	-0.456063	-1.04055	0.376409	-0.462118	0.976494	0.0190157	-0.253158	-0.753805	0.943886
1026	T40.3	Xenograft	0.544544	0.850214	-0.609045	0.421548	1.55755	0.894245	1.79326	0.444449	3.19612	2.97377	2.75105	-0.552677	1.19993	2.48264	0.928376	2.25535	-0.748676	0.0267388	1.18758	-1.97303	-0.71486	-1.23648	0.214091	0.696745	1.99021	-0.0945091	1.42562	1.06028	-1.89144	0.0949511	0.119191	-0.323958	0.409657	-0.384353	-0.968718	-0.106885	2.55214	-0.440367	-0.417546	-0.674623	0.421521	-0.0365525	0.919374	-0.0724565	-0.215464	-0.504466	0.68992
[truncated: 197 more columns]

## Sheet: NormLinear
		Antibody Name	14-3-3-beta	14-3-3-zeta	4E-BP1	4E-BP1_pS65	53BP1	A-Raf	ACC1	ACC_pS79	Akt	Akt_pS473	Akt_pT308	AMPK-a2_pS345	AMPKa	AMPKa_pT172	AR	ARID1A	Atg3	Atg7	ATM	ATM_pS1981	ATR_pS428	Aurora-B	Axl	b-Actin	b-Catenin	b-Catenin_pT41_S45	B-Raf	B-Raf_pS445	B7-H4	Bad_pS112	Bak	Bax	Bcl-xL	Beclin	Bid	Bim	BRD4	c-Abl	c-IAP2	c-Jun_pS73	c-Kit	c-Myc	C-Raf	C-Raf_pS338	Caspase-3	Caspase-7-cleaved	Caveolin-1
		Antibody Origin	R	R	R	R	R	R	R	R	R	R	R	R	R	R	R	R	R	R	R	R	R	R	R	R	R	R	R	R	R	R	R	R	R	G	R	R	R	R	R	R	R	R	R	R	R	R	R
		Gene Name	YWHAB	YWHAZ	EIF4EBP1	EIF4EBP1	TP53BP1	ARAF	ACACA	ACACA	AKT1	AKT1	AKT1	PRKAA2	PRKAA1	PRKAA1	AR	ARID1A	ATG3	ATG7	ATM	ATM	ATR	AIM1	AXL	ACTB	CTNNB1	CTNNB1	BRAF	BRAF	VTCN1	BAD	BAK1	BAX	BCL2L1	BECN1	BID	BCL2L11	BRD4	ABL1	BIRC3	JUN	KIT	MYC	RAF1	RAF1	CASP3	CASP7	CAV1
		Validation Status	V	V	V	V	V	V	C	V	V	V	V	V	C	C	V	C	V	V	V	V	C	V	V	C	V	V	C	V	C	V	C	V	V	C	C	V	V	V	C	V	V	C	C	V	C	C	V
		Slide Id	GBL1105912	GBL1105913	GBL1105659	GBL1105660	GBL1105771	GBL1105824	GBL1105662	GBL1105661	GBL1105792	GBL1105705	GBL1105811	GBL1105844	GBL1105663	GBL1105664	GBL1105752	GBL1105857	GBL1105864	GBL1105865	GBL1105846	GBL1105847	GBL1105888	GBL1105854	GBL1105836	GBL1106096	GBL1105668	GBL1105818	GBL1105901	GBL1105672	GBL1105883	GBL1105665	GBL1105666	GBL1105667	GBL1105669	GBL1106080	GBL1105670	GBL1105671	GBL1105860	GBL1105859	GBL1105866	GBL1105678	GBL1105679	GBL1105915	GBL1105822	GBL1105700	GBL1105673	GBL1105674	GBL1105675
		Antibody Name in Heatmap	14-3-3-beta-R-V	14-3-3-zeta-R-V	4E-BP1-R-V	4E-BP1_pS65-R-V	53BP1-R-V	A-Raf-R-V	ACC1-R-C	ACC_pS79-R-V	Akt-R-V	Akt_pS473-R-V	Akt_pT308-R-V	AMPK-a2_pS345-R-V	AMPKa-R-C	AMPKa_pT172-R-C	AR-R-V	ARID1A-R-C	Atg3-R-V	Atg7-R-V	ATM-R-V	ATM_pS1981-R-V	ATR_pS428-R-C	Aurora-B-R-V	Axl-R-V	b-Actin-R-C	b-Catenin-R-V	b-Catenin_pT41_S45-R-V	B-Raf-R-C	B-Raf_pS445-R-V	B7-H4-R-C	Bad_pS112-R-V	Bak-R-C	Bax-R-V	Bcl-xL-R-V	Beclin-G-C	Bid-R-C	Bim-R-V	BRD4-R-V	c-Abl-R-V	c-IAP2-R-C	c-Jun_pS73-R-V	c-Kit-R-V	c-Myc-R-C	C-Raf-R-C	C-Raf_pS338-R-V	Caspase-3-R-C	Caspase-7-cleaved-R-C	Caveolin-1-R-V
		Probabilities (QC Score)	0.964705	0.936076	0.966809	0.971632	0.976831	0.971028	0.957822	0.961832	0.966332	0.955601	0.964728	0.93228	0.951468	0.963269	0.95913	0.962868	0.936483	0.945226	0.9625	0.891331	0.96244	0.947626	0.975537	0.915854	0.96602	0.963589	0.929994	0.97395	0.911204	0.95666	0.953484	0.950694	0.968278	0.949376	0.965694	0.953509	0.972548	0.952763	0.948834	0.959912	0.948749	0.96168	0.959615	0.970371	0.966016	0.95859	0.951676
		Slide no.	1	2	3	4	5	6	7	8	9	10	11	12	13	14	15	16	17	18	19	20	21	22	23	24	25	26	27	28	29	30	31	32	33	34	35	36	37	38	39	40	41	42	43	44	45	46	47
Order	Sample description	Sample Type	14-3-3-beta-R-V	14-3-3-zeta-R-V	4E-BP1-R-V	4E-BP1_pS65-R-V	53BP1-R-V	A-Raf-R-V	ACC1-R-C	ACC_pS79-R-V	Akt-R-V	Akt_pS473-R-V	Akt_pT308-R-V	AMPK-a2_pS345-R-V	AMPKa-R-C	AMPKa_pT172-R-C	AR-R-V	ARID1A-R-C	Atg3-R-V	Atg7-R-V	ATM-R-V	ATM_pS1981-R-V	ATR_pS428-R-C	Aurora-B-R-V	Axl-R-V	b-Actin-R-C	b-Catenin-R-V	b-Catenin_pT41_S45-R-V	B-Raf-R-C	B-Raf_pS445-R-V	B7-H4-R-C	Bad_pS112-R-V	Bak-R-C	Bax-R-V	Bcl-xL-R-V	Beclin-G-C	Bid-R-C	Bim-R-V	BRD4-R-V	c-Abl-R-V	c-IAP2-R-C	c-Jun_pS73-R-V	c-Kit-R-V	c-Myc-R-C	C-Raf-R-C	C-Raf_pS338-R-V	Caspase-3-R-C	Caspase-7-cleaved-R-C	Caveolin-1-R-V
			NormLinear	NormLinear	NormLinear	NormLinear	NormLinear	NormLinear	NormLinear	NormLinear	NormLinear	NormLinear	NormLinear	NormLinear	NormLinear	NormLinear	NormLinear	NormLinear	NormLinear	NormLinear	NormLinear	NormLinear	NormLinear	NormLinear	NormLinear	NormLinear	NormLinear	NormLinear	NormLinear	NormLinear	NormLinear	NormLinear	NormLinear	NormLinear	NormLinear	NormLinear	NormLinear	NormLinear	NormLinear	NormLinear	NormLinear	NormLinear	NormLinear	NormLinear	NormLinear	NormLinear	NormLinear	NormLinear	NormLinear
960	T3.1	Xenograft	1.02442	0.979001	1.17406	0.985335	0.893024	0.987056	1.00019	1.09978	1.02591	1.02427	0.50645	1.03684	0.992563	1.39518	0.893041	0.952712	0.964994	1.18248	0.923563	1.07722	1.0158	0.944053	0.918698	1.34444	0.83278	1.00992	1.11964	0.948041	1.03367	1.04917	1.03997	1.16642	1.02004	1.08492	1.12525	0.956773	0.896739	0.91299	1.21549	1.11967	1.0958	0.889357	0.959522	1.06903	1.07203	1.34318	0.679871
981	T3.2	Xenograft	0.997531	0.948937	1.06202	1.0302	1.29064	1.02932	0.930379	0.979254	1.06218	0.992708	1.1784	1.06385	1.03287	1.07717	0.979565	1.03254	0.941444	1.08019	1.15013	0.973072	1.10022	0.946418	0.752981	0.926891	1.07555	0.987352	1.06241	1.12088	0.957798	0.984988	0.981444	1.07488	1.06407	0.945187	1.04747	1.02958	1.04193	0.990793	0.965987	1.02395	1.00791	0.996462	1.03994	1.01041	1.01664	1.02356	1.61755
982	T3.3	Xenograft	1.03381	1.05912	1.03775	1.01464	1.12328	1.03773	1.0405	0.94645	0.955164	0.907972	0.862106	0.824811	0.971261	0.894003	1.01929	1.16895	1.05139	0.912944	1.15104	1.00831	1.00243	0.978982	1.63895	0.778065	1.04384	0.989914	0.893366	1.02192	0.967708	1.00416	0.989139	1.04743	1.0116	1.06154	0.991915	1.0944	1.16245	1.02477	0.780941	0.902163	0.823014	0.974412	1.04278	0.967352	0.846413	0.902557	1.63402
1007	T40.1	Xenograft	1.04595	1.10053	0.990557	1.01659	0.920334	0.905178	1.12126	1.10924	0.850172	0.839375	0.644831	0.990671	0.922422	0.831405	1.0401	0.8037	1.1089	0.996921	0.941727	1.07358	0.987858	0.924939	0.637	1.61708	0.92199	1.03824	1.07986	1.02812	0.972661	0.960458	1.06424	0.979638	1.02003	1.07738	0.945661	0.94211	0.820298	0.887381	0.867884	0.896608	1.05326	0.889825	0.963957	1.05331	1.07256	1.19772	0.75155
1008	T40.2	Xenograft	1.01805	0.940304	0.88592	0.957266	1.06431	0.954371	0.743254	0.95557	1.0544	1.23683	1.20067	1.0508	1.00364	1.03425	1.14747	0.994964	0.850501	1.1007	1.02883	0.947933	0.955867	0.861321	1.19995	0.885866	1.09126	1.01802	1.05113	0.984526	0.914243	1.03168	0.936337	0.951813	0.962763	1.05355	0.953909	0.973918	1.06	0.961525	1.05232	0.896718	1.0345	0.833268	0.987053	1.04103	1.03095	0.797524	1.14319
1026	T40.3	Xenograft	1.00571	1.00351	0.876833	0.948226	0.981699	0.972702	0.872575	0.926639	0.901429	1.01204	1.14373	1.0395	1.02535	1.05587	0.864869	0.811009	0.888974	0.931708	0.985343	1.00596	0.991545	1.0624	1.02311	1.08276	0.999486	1.0178	0.925569	0.883993	1.04988	0.944665	0.975258	0.901856	0.945221	0.925087	1.00295	0.979359	0.90152	1.02967	1.06891	1.1429	1.05563	1.10686	0.938306	0.966334	1.0466	0.937565	0.948129
[truncated: 199 more columns]

## Sheet: NormLog2
		Antibody Name	14-3-3-beta	14-3-3-zeta	4E-BP1	4E-BP1_pS65	53BP1	A-Raf	ACC1	ACC_pS79	Akt	Akt_pS473	Akt_pT308	AMPK-a2_pS345	AMPKa	AMPKa_pT172	AR	ARID1A	Atg3	Atg7	ATM	ATM_pS1981	ATR_pS428	Aurora-B	Axl	b-Actin	b-Catenin	b-Catenin_pT41_S45	B-Raf	B-Raf_pS445	B7-H4	Bad_pS112	Bak	Bax	Bcl-xL	Beclin	Bid	Bim	BRD4	c-Abl	c-IAP2	c-Jun_pS73	c-Kit	c-Myc	C-Raf	C-Raf_pS338	Caspase-3	Caspase-7-cleaved	Caveolin-1
		Antibody Origin	R	R	R	R	R	R	R	R	R	R	R	R	R	R	R	R	R	R	R	R	R	R	R	R	R	R	R	R	R	R	R	R	R	G	R	R	R	R	R	R	R	R	R	R	R	R	R
		Gene Name	YWHAB	YWHAZ	EIF4EBP1	EIF4EBP1	TP53BP1	ARAF	ACACA	ACACA	AKT1	AKT1	AKT1	PRKAA2	PRKAA1	PRKAA1	AR	ARID1A	ATG3	ATG7	ATM	ATM	ATR	AIM1	AXL	ACTB	CTNNB1	CTNNB1	BRAF	BRAF	VTCN1	BAD	BAK1	BAX	BCL2L1	BECN1	BID	BCL2L11	BRD4	ABL1	BIRC3	JUN	KIT	MYC	RAF1	RAF1	CASP3	CASP7	CAV1
		Validation Status	V	V	V	V	V	V	C	V	V	V	V	V	C	C	V	C	V	V	V	V	C	V	V	C	V	V	C	V	C	V	C	V	V	C	C	V	V	V	C	V	V	C	C	V	C	C	V
		Slide Id	GBL1105912	GBL1105913	GBL1105659	GBL1105660	GBL1105771	GBL1105824	GBL1105662	GBL1105661	GBL1105792	GBL1105705	GBL1105811	GBL1105844	GBL1105663	GBL1105664	GBL1105752	GBL1105857	GBL1105864	GBL1105865	GBL1105846	GBL1105847	GBL1105888	GBL1105854	GBL1105836	GBL1106096	GBL1105668	GBL1105818	GBL1105901	GBL1105672	GBL1105883	GBL1105665	GBL1105666	GBL1105667	GBL1105669	GBL1106080	GBL1105670	GBL1105671	GBL1105860	GBL1105859	GBL1105866	GBL1105678	GBL1105679	GBL1105915	GBL1105822	GBL1105700	GBL1105673	GBL1105674	GBL1105675
		Antibody Name in Heatmap	14-3-3-beta-R-V	14-3-3-zeta-R-V	4E-BP1-R-V	4E-BP1_pS65-R-V	53BP1-R-V	A-Raf-R-V	ACC1-R-C	ACC_pS79-R-V	Akt-R-V	Akt_pS473-R-V	Akt_pT308-R-V	AMPK-a2_pS345-R-V	AMPKa-R-C	AMPKa_pT172-R-C	AR-R-V	ARID1A-R-C	Atg3-R-V	Atg7-R-V	ATM-R-V	ATM_pS1981-R-V	ATR_pS428-R-C	Aurora-B-R-V	Axl-R-V	b-Actin-R-C	b-Catenin-R-V	b-Catenin_pT41_S45-R-V	B-Raf-R-C	B-Raf_pS445-R-V	B7-H4-R-C	Bad_pS112-R-V	Bak-R-C	Bax-R-V	Bcl-xL-R-V	Beclin-G-C	Bid-R-C	Bim-R-V	BRD4-R-V	c-Abl-R-V	c-IAP2-R-C	c-Jun_pS73-R-V	c-Kit-R-V	c-Myc-R-C	C-Raf-R-C	C-Raf_pS338-R-V	Caspase-3-R-C	Caspase-7-cleaved-R-C	Caveolin-1-R-V
		Probabilities (QC Score)	0.964705	0.936076	0.966809	0.971632	0.976831	0.971028	0.957822	0.961832	0.966332	0.955601	0.964728	0.93228	0.951468	0.963269	0.95913	0.962868	0.936483	0.945226	0.9625	0.891331	0.96244	0.947626	0.975537	0.915854	0.96602	0.963589	0.929994	0.97395	0.911204	0.95666	0.953484	0.950694	0.968278	0.949376	0.965694	0.953509	0.972548	0.952763	0.948834	0.959912	0.948749	0.96168	0.959615	0.970371	0.966016	0.95859	0.951676
		Slide no.	1	2	3	4	5	6	7	8	9	10	11	12	13	14	15	16	17	18	19	20	21	22	23	24	25	26	27	28	29	30	31	32	33	34	35	36	37	38	39	40	41	42	43	44	45	46	47
Order	Sample description	Sample Type	14-3-3-beta-R-V	14-3-3-zeta-R-V	4E-BP1-R-V	4E-BP1_pS65-R-V	53BP1-R-V	A-Raf-R-V	ACC1-R-C	ACC_pS79-R-V	Akt-R-V	Akt_pS473-R-V	Akt_pT308-R-V	AMPK-a2_pS345-R-V	AMPKa-R-C	AMPKa_pT172-R-C	AR-R-V	ARID1A-R-C	Atg3-R-V	Atg7-R-V	ATM-R-V	ATM_pS1981-R-V	ATR_pS428-R-C	Aurora-B-R-V	Axl-R-V	b-Actin-R-C	b-Catenin-R-V	b-Catenin_pT41_S45-R-V	B-Raf-R-C	B-Raf_pS445-R-V	B7-H4-R-C	Bad_pS112-R-V	Bak-R-C	Bax-R-V	Bcl-xL-R-V	Beclin-G-C	Bid-R-C	Bim-R-V	BRD4-R-V	c-Abl-R-V	c-IAP2-R-C	c-Jun_pS73-R-V	c-Kit-R-V	c-Myc-R-C	C-Raf-R-C	C-Raf_pS338-R-V	Caspase-3-R-C	Caspase-7-cleaved-R-C	Caveolin-1-R-V
			NormLog2	NormLog2	NormLog2	NormLog2	NormLog2	NormLog2	NormLog2	NormLog2	NormLog2	NormLog2	NormLog2	NormLog2	NormLog2	NormLog2	NormLog2	NormLog2	NormLog2	NormLog2	NormLog2	NormLog2	NormLog2	NormLog2	NormLog2	NormLog2	NormLog2	NormLog2	NormLog2	NormLog2	NormLog2	NormLog2	NormLog2	NormLog2	NormLog2	NormLog2	NormLog2	NormLog2	NormLog2	NormLog2	NormLog2	NormLog2	NormLog2	NormLog2	NormLog2	NormLog2	NormLog2	NormLog2	NormLog2
960	T3.1	Xenograft	0.034809	-0.030617	0.231511	-0.0213143	-0.16323	-0.0187955	0.000268383	0.137214	0.0369071	0.0345906	-0.981509	0.0521979	-0.0107692	0.480449	-0.163201	-0.0698883	-0.0514085	0.241814	-0.114718	0.107314	0.0226103	-0.0830602	-0.122338	0.427003	-0.263992	0.0142475	0.163029	-0.076978	0.0477707	0.069248	0.0565404	0.222085	0.0286266	0.117589	0.170247	-0.0637513	-0.15724	-0.131329	0.281543	0.163076	0.131986	-0.169165	-0.0596129	0.0963066	0.100341	0.425653	-0.556668
981	T3.2	Xenograft	-0.00356576	-0.0756153	0.0868064	0.0429247	0.368082	0.0416879	-0.104109	-0.0302445	0.087025	-0.0105586	0.236829	0.0892902	0.0466628	0.107245	-0.0297867	0.0461969	-0.0870529	0.11129	0.201791	-0.0393813	0.137786	-0.0794501	-0.409314	-0.109529	0.105079	-0.0183632	0.0873471	0.16463	-0.0622067	-0.0218226	-0.0270221	0.104181	0.089596	-0.081329	0.0669079	0.0420564	0.0592634	-0.0133447	-0.0499244	0.034152	0.0113663	-0.00511376	0.0564997	0.0149349	0.0238085	0.0335903	0.693811
982	T3.3	Xenograft	0.0479649	0.0828684	0.0534525	0.0209717	0.167723	0.0534329	0.0572725	-0.0794022	-0.0661789	-0.139281	-0.214063	-0.277864	-0.0420693	-0.161649	0.0275627	0.225209	0.0723046	-0.131402	0.202935	0.0119365	0.00349765	-0.0306455	0.712773	-0.362038	0.0618961	-0.0146252	-0.162677	0.0312884	-0.0473567	0.00599491	-0.0157544	0.0668595	0.0166331	0.0861592	-0.0117116	0.130135	0.217167	0.0352948	-0.356715	-0.148541	-0.281011	-0.0373955	0.0604411	-0.047887	-0.240567	-0.147909	0.708424
1007	T40.1	Xenograft	0.0648076	0.138204	-0.0136878	0.0237446	-0.11977	-0.143727	0.165116	0.149573	-0.234174	-0.252612	-0.633007	-0.0135221	-0.116501	-0.266377	0.0567278	-0.315271	0.149131	-0.00444892	-0.0866196	0.102436	-0.0176246	-0.112569	-0.650634	0.693395	-0.117176	0.054138	0.11085	0.0400153	-0.0399916	-0.0582049	0.0898188	-0.0296799	0.0286095	0.107525	-0.0806044	-0.086032	-0.28578	-0.172374	-0.204425	-0.157451	0.0748575	-0.168406	-0.0529586	0.0749322	0.101053	0.26029	-0.412059
1008	T40.2	Xenograft	0.0258075	-0.0888008	-0.174751	-0.063008	0.0899215	-0.0673775	-0.428073	-0.065566	0.0764186	0.306644	0.263838	0.0714917	0.00524093	0.0485854	0.198458	-0.00728314	-0.233614	0.138418	0.0410062	-0.0771427	-0.0651182	-0.215376	0.262979	-0.174839	0.126001	0.0257639	0.0719373	-0.0224991	-0.129351	0.044993	-0.0949	-0.0712493	-0.0547479	0.0752528	-0.0680772	-0.0381284	0.0840588	-0.0566031	0.0735766	-0.157273	0.048935	-0.263147	-0.0188012	0.0580144	0.0439712	-0.3264	0.19307
1026	T40.3	Xenograft	0.00821261	0.00506157	-0.189627	-0.0766975	-0.0266472	-0.0399309	-0.196649	-0.10992	-0.149715	0.0172663	0.193752	0.0558948	0.0361132	0.0784376	-0.209446	-0.302211	-0.169787	-0.10205	-0.021302	0.0085801	-0.0122495	0.0873204	0.0329615	0.114719	-0.000741029	0.0254472	-0.111588	-0.177894	0.0702261	-0.0821246	-0.0361442	-0.149031	-0.0812763	-0.112339	0.0042449	-0.03009	-0.149569	0.0421801	0.0961453	0.192703	0.078099	0.14647	-0.09187	-0.0494064	0.0657157	-0.0930097	-0.0768453
[truncated: 197 more columns]

## Sheet: NormLog2_MedianCentered
		Antibody Name	14-3-3-beta	14-3-3-zeta	4E-BP1	4E-BP1_pS65	53BP1	A-Raf	ACC1	ACC_pS79	Akt	Akt_pS473	Akt_pT308	AMPK-a2_pS345	AMPKa	AMPKa_pT172	AR	ARID1A	Atg3	Atg7	ATM	ATM_pS1981	ATR_pS428	Aurora-B	Axl	b-Actin	b-Catenin	b-Catenin_pT41_S45	B-Raf	B-Raf_pS445	B7-H4	Bad_pS112	Bak	Bax	Bcl-xL	Beclin	Bid	Bim	BRD4	c-Abl	c-IAP2	c-Jun_pS73	c-Kit	c-Myc	C-Raf	C-Raf_pS338	Caspase-3	Caspase-7-cleaved	Caveolin-1
		Antibody Origin	R	R	R	R	R	R	R	R	R	R	R	R	R	R	R	R	R	R	R	R	R	R	R	R	R	R	R	R	R	R	R	R	R	G	R	R	R	R	R	R	R	R	R	R	R	R	R
		Gene Name	YWHAB	YWHAZ	EIF4EBP1	EIF4EBP1	TP53BP1	ARAF	ACACA	ACACA	AKT1	AKT1	AKT1	PRKAA2	PRKAA1	PRKAA1	AR	ARID1A	ATG3	ATG7	ATM	ATM	ATR	AIM1	AXL	ACTB	CTNNB1	CTNNB1	BRAF	BRAF	VTCN1	BAD	BAK1	BAX	BCL2L1	BECN1	BID	BCL2L11	BRD4	ABL1	BIRC3	JUN	KIT	MYC	RAF1	RAF1	CASP3	CASP7	CAV1
		Validation Status	V	V	V	V	V	V	C	V	V	V	V	V	C	C	V	C	V	V	V	V	C	V	V	C	V	V	C	V	C	V	C	V	V	C	C	V	V	V	C	V	V	C	C	V	C	C	V
		Slide Id	GBL1105912	GBL1105913	GBL1105659	GBL1105660	GBL1105771	GBL1105824	GBL1105662	GBL1105661	GBL1105792	GBL1105705	GBL1105811	GBL1105844	GBL1105663	GBL1105664	GBL1105752	GBL1105857	GBL1105864	GBL1105865	GBL1105846	GBL1105847	GBL1105888	GBL1105854	GBL1105836	GBL1106096	GBL1105668	GBL1105818	GBL1105901	GBL1105672	GBL1105883	GBL1105665	GBL1105666	GBL1105667	GBL1105669	GBL1106080	GBL1105670	GBL1105671	GBL1105860	GBL1105859	GBL1105866	GBL1105678	GBL1105679	GBL1105915	GBL1105822	GBL1105700	GBL1105673	GBL1105674	GBL1105675
		Antibody Name in Heatmap	14-3-3-beta-R-V	14-3-3-zeta-R-V	4E-BP1-R-V	4E-BP1_pS65-R-V	53BP1-R-V	A-Raf-R-V	ACC1-R-C	ACC_pS79-R-V	Akt-R-V	Akt_pS473-R-V	Akt_pT308-R-V	AMPK-a2_pS345-R-V	AMPKa-R-C	AMPKa_pT172-R-C	AR-R-V	ARID1A-R-C	Atg3-R-V	Atg7-R-V	ATM-R-V	ATM_pS1981-R-V	ATR_pS428-R-C	Aurora-B-R-V	Axl-R-V	b-Actin-R-C	b-Catenin-R-V	b-Catenin_pT41_S45-R-V	B-Raf-R-C	B-Raf_pS445-R-V	B7-H4-R-C	Bad_pS112-R-V	Bak-R-C	Bax-R-V	Bcl-xL-R-V	Beclin-G-C	Bid-R-C	Bim-R-V	BRD4-R-V	c-Abl-R-V	c-IAP2-R-C	c-Jun_pS73-R-V	c-Kit-R-V	c-Myc-R-C	C-Raf-R-C	C-Raf_pS338-R-V	Caspase-3-R-C	Caspase-7-cleaved-R-C	Caveolin-1-R-V
		Probabilities (QC Score)	0.964705	0.936076	0.966809	0.971632	0.976831	0.971028	0.957822	0.961832	0.966332	0.955601	0.964728	0.93228	0.951468	0.963269	0.95913	0.962868	0.936483	0.945226	0.9625	0.891331	0.96244	0.947626	0.975537	0.915854	0.96602	0.963589	0.929994	0.97395	0.911204	0.95666	0.953484	0.950694	0.968278	0.949376	0.965694	0.953509	0.972548	0.952763	0.948834	0.959912	0.948749	0.96168	0.959615	0.970371	0.966016	0.95859	0.951676
		Slide no.	1	2	3	4	5	6	7	8	9	10	11	12	13	14	15	16	17	18	19	20	21	22	23	24	25	26	27	28	29	30	31	32	33	34	35	36	37	38	39	40	41	42	43	44	45	46	47
Order	Sample description	Sample Type	14-3-3-beta-R-V	14-3-3-zeta-R-V	4E-BP1-R-V	4E-BP1_pS65-R-V	53BP1-R-V	A-Raf-R-V	ACC1-R-C	ACC_pS79-R-V	Akt-R-V	Akt_pS473-R-V	Akt_pT308-R-V	AMPK-a2_pS345-R-V	AMPKa-R-C	AMPKa_pT172-R-C	AR-R-V	ARID1A-R-C	Atg3-R-V	Atg7-R-V	ATM-R-V	ATM_pS1981-R-V	ATR_pS428-R-C	Aurora-B-R-V	Axl-R-V	b-Actin-R-C	b-Catenin-R-V	b-Catenin_pT41_S45-R-V	B-Raf-R-C	B-Raf_pS445-R-V	B7-H4-R-C	Bad_pS112-R-V	Bak-R-C	Bax-R-V	Bcl-xL-R-V	Beclin-G-C	Bid-R-C	Bim-R-V	BRD4-R-V	c-Abl-R-V	c-IAP2-R-C	c-Jun_pS73-R-V	c-Kit-R-V	c-Myc-R-C	C-Raf-R-C	C-Raf_pS338-R-V	Caspase-3-R-C	Caspase-7-cleaved-R-C	Caveolin-1-R-V
			Median-Centered	Median-Centered	Median-Centered	Median-Centered	Median-Centered	Median-Centered	Median-Centered	Median-Centered	Median-Centered	Median-Centered	Median-Centered	Median-Centered	Median-Centered	Median-Centered	Median-Centered	Median-Centered	Median-Centered	Median-Centered	Median-Centered	Median-Centered	Median-Centered	Median-Centered	Median-Centered	Median-Centered	Median-Centered	Median-Centered	Median-Centered	Median-Centered	Median-Centered	Median-Centered	Median-Centered	Median-Centered	Median-Centered	Median-Centered	Median-Centered	Median-Centered	Median-Centered	Median-Centered	Median-Centered	Median-Centered	Median-Centered	Median-Centered	Median-Centered	Median-Centered	Median-Centered	Median-Centered	Median-Centered
960	T3.1	Xenograft	0.00450075	-0.0178393	0.211629	-0.021143	-0.194867	0.0105677	0.0521889	0.18512	0.051543	0.0312368	-0.971353	-0.00184849	-0.00800507	0.416937	-0.162089	-0.0313026	0.0178222	0.188394	-0.124571	0.0970556	0.0269862	-0.00180506	-0.0776496	0.424408	-0.29457	-0.00559982	0.0833869	-0.0813726	0.0914448	0.0771618	0.0779286	0.203495	0.00600535	0.0368827	0.173981	-0.0296422	-0.112087	-0.0963549	0.269717	0.22027	0.0700894	-0.0662642	-0.0237329	0.059832	0.0454973	0.455363	-0.61478
981	T3.2	Xenograft	-0.033874	-0.0628376	0.0669241	0.043096	0.336445	0.0710511	-0.0521889	0.0176607	0.101661	-0.0139125	0.246985	0.0352438	0.049427	0.0437338	-0.0286747	0.0847826	-0.0178222	0.0578697	0.191939	-0.0496396	0.142162	0.00180506	-0.364626	-0.112124	0.0745018	-0.0382106	0.00770487	0.160235	-0.0185326	-0.0139087	-0.00563389	0.0855911	0.0669747	-0.162035	0.0706413	0.0761656	0.104416	0.0216292	-0.0617505	0.0913463	-0.0505299	0.0977872	0.0923796	-0.0215398	-0.0310349	0.0633	0.635699
982	T3.3	Xenograft	0.0176567	0.0956462	0.0335702	0.021143	0.136086	0.0827961	0.109193	-0.031497	-0.051543	-0.142635	-0.203907	-0.331911	-0.0393052	-0.22516	0.0286747	0.263794	0.141535	-0.184822	0.193083	0.0016782	0.00787357	0.0506097	0.757461	-0.364633	0.0313185	-0.0344725	-0.242319	0.0268937	-0.00368254	0.0139087	0.00563389	0.0482697	-0.00598819	0.00545322	-0.00797826	0.164244	0.26232	0.0702687	-0.368541	-0.0913463	-0.342907	0.0655054	0.096321	-0.0843616	-0.29541	-0.1182	0.650312
1007	T40.1	Xenograft	0.0344994	0.150981	-0.0335702	0.0239159	-0.151407	-0.114364	0.217037	0.197479	-0.219538	-0.255966	-0.622852	-0.0675685	-0.113737	-0.329889	0.0578398	-0.276686	0.218362	-0.0578697	-0.0964718	0.0921776	-0.0132487	-0.0313142	-0.605946	0.6908	-0.147754	0.0342906	0.0312075	0.0356207	0.00368254	-0.0502911	0.111207	-0.0482697	0.00598819	0.0268194	-0.0768711	-0.0519228	-0.240628	-0.1374	-0.216251	-0.100256	0.0129613	-0.0655054	-0.0170787	0.0384576	0.0462095	0.29	-0.470171
1008	T40.2	Xenograft	-0.00450075	-0.0760231	-0.194633	-0.0628366	0.0582844	-0.0380142	-0.376153	-0.0176607	0.0910545	0.30329	0.273993	0.0174454	0.00800507	-0.0149261	0.19957	0.0313026	-0.164384	0.0849975	0.0311541	-0.087401	-0.0607422	-0.134121	0.307667	-0.177434	0.0954235	0.0059165	-0.00770487	-0.0268937	-0.0856765	0.0529068	-0.0735117	-0.0898391	-0.0773692	-0.00545322	-0.0643438	-0.0040192	0.129212	-0.0216292	0.0617505	-0.100079	-0.0129613	-0.160246	0.0170787	0.0215398	-0.0108723	-0.29669	0.134957
1026	T40.3	Xenograft	-0.0220956	0.0178393	-0.209509	-0.0765262	-0.0582844	-0.0105677	-0.144728	-0.0620148	-0.135079	0.0139125	0.203907	0.00184849	0.0388773	0.0149261	-0.208334	-0.263625	-0.100557	-0.15547	-0.0311541	-0.0016782	-0.00787357	0.168576	0.0776496	0.112124	-0.0313185	0.00559982	-0.19123	-0.182289	0.1139	-0.0742108	-0.0147559	-0.167621	-0.103898	-0.193045	0.00797826	0.0040192	-0.104416	0.077154	0.0843192	0.249897	0.0162027	0.249371	-0.0559901	-0.085881	0.0108723	-0.0633	-0.134957
[truncated: 197 more columns]
